# Supplementary material
Source: Elsevier journal article supplement (https://www.sciencedirect.com/science/article/pii/S0300893217307984)
Supplement: mmc1 [file S0300893217307984:mmc1.pdf]

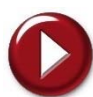

## Material suplementario

---

# Primera resonancia magnética gestionada por cardiología en la red sanitaria pública española: experiencia y dificultades de un modelo innovador

---

### *Plan de formación y recursos humanos*

La formación de los profesionales ligados al programa de RM cardíaca, se acompañó de una serie de estancias en centros de excelencia nacionales: Centro Médico ERESA, Centro Nacional de Investigaciones Cardiovasculares (CNIC), Hospital General Universitario Gregorio Marañón, Hospital Santa Creu i Sant Pau, Hospital Universitario La Paz y Hospital Universitario Puerta de Hierro) e internacionales (UZ Leuven, Bélgica).

### *Programación de actividad*

Diariamente un TER y un cardiólogo trabajan en la RM cardíaca de forma exclusiva en horario de 8.00-15.00 horas de lunes a viernes, evolucionando nuestra programación a lo largo del proyecto en función de las necesidades asistenciales y de investigación hasta el esquema actual mostrado (tabla del material suplementario). Desde el tercer trimestre de 2016 se ha puesto en marcha un segundo turno diario, de 15.00-22.00 horas, aquellas jornadas que se dispone de suficientes recursos humanos (mediana 10 jornadas/mes).

### *Número de estudios y procedimiento*

Las secuencias de RM más utilizadas según tipo fueron (porcentaje del total de estudios en los que se utilizó cada secuencia): 1) anatómicas: SSH-BTFE (88,5%), TSE-T1w (23%) y Whole-Heart (6,4%); 2) funcionales: cine-SSFP (85,2%) y contraste de fases (73,3%); 3) realizadas por contraste: angiografía (16,9%) y perfusión de primer paso (54,3%) y; 4) caracterización tisular: realce tardío (74,5%), TSE-T2w-STIR (35,8%), mapas paramétricos (T1 35,3%; T2 36,3%, T2\* 16,0%).

**Tabla del material suplementario.****Programación diaria en el momento actual del equipo de resonancia magnética**

| Hora citada | Hora inicio | Hora final | Lunes         | Martes        | Miércoles     | Jueves        | Viernes       |
|-------------|-------------|------------|---------------|---------------|---------------|---------------|---------------|
| 08:15       | 08:30       | 09:15      | Ambulatorio   | Ambulatorio   | Ambulatorio   | Ambulatorio   | Ambulatorio   |
| 09:00       | 09:15       | 10:00      | Ambulatorio   | Ambulatorio   | Ambulatorio   | Ambulatorio   | Ambulatorio   |
| 09:45       | 10:00       | 10:45      | Ingresado     | Ingresado     | Ingresado     | Ingresado     | Ingresado     |
|             | 10:45       | 11:30      | <i>Buffer</i> |               |               |               |               |
| 11:15       | 11:30       | 12:15      | Investigación | Investigación | Investigación | Investigación | Investigación |
| 12:00       | 12:15       | 13:00      | Investigación | Investigación | Investigación | Investigación | Investigación |
| 12:45       | 13:00       | 13:45      | Investigación | Investigación | Investigación | Investigación | Investigación |
|             | 13:45       | 14:30      | <i>Buffer</i> |               |               |               |               |

Organigrama de funcionamiento diario de la RM cardiovascular. *Buffer*: tiempo estimado para compensar retrasos e interrupciones en la programación. Los huecos para RM en investigación que no se cubren son utilizados para pacientes ambulatorios. Asimismo, si es preciso incrementar un hueco para un paciente ingresado existe la disponibilidad temporal utilizando los tiempos *buffer*. Los huecos totales anuales estimados en esta programación son 1584.
